# Supplementary material
Source: PubMed Central journal article supplement (PMC11618391)
Supplement: NIHMS2036715-supplement-supplemental_table.pdf [file NIHMS2036715-supplement-supplemental_table.pdf]

## Supplemental Online Content

Hartman J, Patki T, Johnson NE. Diagnosis and management of myotonic dystrophy type 1. *JAMA*. doi:10.1001/jama.2024.2511

**eTable.** Management of Individuals With Monotonic Dystrophy Type 1

This supplemental material has been provided by the authors to give readers additional information about their work.

eTable. Management of Individuals With Myotonic Dystrophy Type 1

| System                 | Symptoms and Clinical Presentations                                                                                                                                                                                                                                                                       | Management                                                                                                                                                                                                                                                                                                                                                                                                                                                                 |
|------------------------|-----------------------------------------------------------------------------------------------------------------------------------------------------------------------------------------------------------------------------------------------------------------------------------------------------------|----------------------------------------------------------------------------------------------------------------------------------------------------------------------------------------------------------------------------------------------------------------------------------------------------------------------------------------------------------------------------------------------------------------------------------------------------------------------------|
| Surgery and anesthesia | <ul style="list-style-type: none"> <li>Hypersensitivity to sedatives/analgesics</li> <li>Paradoxical reaction to muscle-depolarizing agents</li> <li>Cardiac conduction defects/arrhythmias</li> <li>Ventilatory insufficiency or poor airway protection</li> <li>Gastrointestinal dysmotility</li> </ul> | <ul style="list-style-type: none"> <li>- Patient and neuromuscular clinician should meet prior to surgery to discuss anesthesia and surgery risks</li> <li>- Minimize complications during surgery with airway care, choice of induction agents, local anesthesia, and neuromuscular blockade.</li> <li>- Consider prophylactic defibrillator/pacemaker</li> <li>- Monitor for aspiration and gastrointestinal pseudo-obstructions in the post-operative period</li> </ul> |
| Respiratory            | <ul style="list-style-type: none"> <li>Ineffective cough</li> <li>Recurrent pulmonary infections</li> <li>FVC&lt;50% of predicted or maximum inspiratory pressure (MIP)&lt;60</li> </ul>                                                                                                                  | <ul style="list-style-type: none"> <li>- Respiratory function testing at baseline and annually thereafter (FVC, FEV1, MIP, maximum expiratory pressure (MEP), nocturnal oximetry, and cough peak expiratory flow)</li> <li>- Patients should stay up to date on recommended vaccinations</li> </ul>                                                                                                                                                                        |
| Cardiovascular         | <ul style="list-style-type: none"> <li>Sinus bradycardia</li> <li>Progressive heart block</li> <li>Atrial fibrillation or flutter</li> <li>Ventricular tachycardia</li> </ul>                                                                                                                             | <ul style="list-style-type: none"> <li>- ECG at diagnosis; annually thereafter</li> <li>- Treat with guidelines for ICD/pacemaker placement</li> <li>- Referral to cardiologist is warranted for any cardiac abnormalities</li> </ul> <p style="text-align: center;">**Of note, heart failure is not considered to be a defining symptom</p>                                                                                                                               |

| System                    | Symptoms and Clinical Presentations                                                                                                                                                                                                                                                                                                                                                                  | Management                                                                                                                                                                                                                                                                                                                                                                                                                                                                                                                                                                                                                                                                                                |
|---------------------------|------------------------------------------------------------------------------------------------------------------------------------------------------------------------------------------------------------------------------------------------------------------------------------------------------------------------------------------------------------------------------------------------------|-----------------------------------------------------------------------------------------------------------------------------------------------------------------------------------------------------------------------------------------------------------------------------------------------------------------------------------------------------------------------------------------------------------------------------------------------------------------------------------------------------------------------------------------------------------------------------------------------------------------------------------------------------------------------------------------------------------|
| Gynecology and obstetrics | <p>Gynecological:</p> <ul style="list-style-type: none"> <li>- Painful or irregular menses</li> <li>- Infertility</li> </ul> <p>Obstetrics:</p> <ul style="list-style-type: none"> <li>- Accelerated myotonic dystrophy type 1 progression</li> <li>- Preeclampsia</li> <li>- Prolonged labor</li> <li>- Spontaneous abortion</li> <li>- Placenta previa</li> <li>- Peripartum hemorrhage</li> </ul> | <ul style="list-style-type: none"> <li>- Carefully evaluate patients' reproductive history, myotonic dystrophy-related personal history, and myotonic dystrophy family history</li> <li>- Referral to a high-risk obstetrician (maternal-fetal medicine specialist) for prenatal care and delivery</li> <li>- Cesarean delivery should be carefully considered - anesthetics or sedating anesthetic drugs should be used with caution (see surgery, anesthesia, and pain section)</li> <li>- Family planning is recommended; diagnostic testing (preimplantation genetic diagnosis, amniocentesis, or chorionic villus sampling) paired with counseling can determine if the fetus is affected</li> </ul> |
| Musculoskeletal           | <p>Skeletal muscle weakness</p> <ul style="list-style-type: none"> <li>- Bulbar/ocular muscles</li> <li>- Finger flexors and ankle dorsiflexors</li> <li>- Abdominal or diaphragm</li> </ul>                                                                                                                                                                                                         | <ul style="list-style-type: none"> <li>- Annual evaluation to identify swallowing or speech difficulties, difficulty with mobility/balance (risk of falls)</li> <li>- Evaluation by physical or occupational therapist for assistance with orthotics, assistive devices, or activities of daily living</li> <li>- Moderate/low-intensity aerobic and resistance exercise</li> </ul>                                                                                                                                                                                                                                                                                                                       |
|                           | Myotonia                                                                                                                                                                                                                                                                                                                                                                                             | - Mexiletine as symptomatic treatment                                                                                                                                                                                                                                                                                                                                                                                                                                                                                                                                                                                                                                                                     |
| Ocular                    | Cataracts                                                                                                                                                                                                                                                                                                                                                                                            | - Annual eye exam; slit-lamp exam to look for multicolored, iridescent, punctate opacities located in posterior lens capsule                                                                                                                                                                                                                                                                                                                                                                                                                                                                                                                                                                              |
| Gastrointestinal          | <p>Dysphagia, dysarthria, aspiration</p> <p>Gastroesophageal reflux</p> <p>Irritable bowel symptoms</p>                                                                                                                                                                                                                                                                                              | <ul style="list-style-type: none"> <li>- Referral to a speech therapist</li> <li>- Modified barium swallow or barium upper GI radiographic evaluation</li> <li>- Screening with a glucose breath test for bacterial overgrowth syndrome</li> </ul>                                                                                                                                                                                                                                                                                                                                                                                                                                                        |

| System                  | Symptoms and Clinical Presentations                                                                                                                       | Management                                                                                                                                                                                                                                                                                                                                                                                                                    |
|-------------------------|-----------------------------------------------------------------------------------------------------------------------------------------------------------|-------------------------------------------------------------------------------------------------------------------------------------------------------------------------------------------------------------------------------------------------------------------------------------------------------------------------------------------------------------------------------------------------------------------------------|
| Central nervous         | Excessive daytime sleepiness<br>Sleep apnea                                                                                                               | - Respiratory function testing and sleep study.<br>- Stimulant therapy with modafinil or armodafinil                                                                                                                                                                                                                                                                                                                          |
|                         | Intellectual disability<br>Impaired attention<br>Mood/anxiety disorders<br>Abnormal visual-spatial abilities<br>Delusions or psychotic features<br>Apathy | - Annual neuropsychological evaluation is recommended with insight from patients' family or partner<br>- Psychostimulants can be warranted if apathy is associated with an impairing level of fatigue or excessive daytime sleepiness<br>- Referral to a mental health care professional when evaluation indicates psychiatric/behavioral abnormalities                                                                       |
| Endocrine and metabolic | Hyperlipidemia<br>Diabetes Mellitus (T1DM, T2DM)<br>Thyroid Dysfunction<br>Liver Enzyme Elevation<br>Gonadal Insufficiency<br>Erectile Dysfunction        | - Test for endocrine/metabolic perturbations at baseline and annually thereafter (blood glucose, serum lipids, thyroid levels, liver enzymes and bilirubin)<br>a. Chronic liver enzyme elevation is not uncommon and alone does not warrant a liver biopsy<br>- Impact of statins is unknown, clinicians should monitor for muscle side effects<br>- Consider erectile dysfunction medications but be cautious of hypotension |
| Tumors                  | Increased risk of cancer                                                                                                                                  | - Regular screenings for patient's age and sex<br>- Encouraged to closely monitor for the following cancer types:<br>a. Colon, breast, testicular, cervical, skin (pilomatrixomas) <sup>a</sup>                                                                                                                                                                                                                               |

<sup>a</sup>Source: D'Ambrosio ES, Gonzalez-Perez P. Cancer and myotonic dystrophy. *J Clin Med.* 2023;12(5):1939. Medline:36902726 doi:10.3390/jcm12051939
